# Supplementary material for: Association between work characteristics and epigenetic age acceleration: cross-sectional results from UK – Understanding Society study
Source: publisher site journal article supplement (doi:10.18632/aging.204327), 2022-10-05
Supplement: Supplementary file [file aging-v14i19-204327-supplementary-material-SD2.pdf]

## SUPPLEMENTARY TABLES

**Supplementary Table 1. Unadjusted linear regression estimated coefficients with 95% confidence intervals for the epigenetic age and pace of aging.**

|                                    | Levels                                      | HorvathAA                 | HannumAA                    | PhenoAA                    | GrimaAgeAA                  | DunedinPoAm                | DunedinPACE                 |
|------------------------------------|---------------------------------------------|---------------------------|-----------------------------|----------------------------|-----------------------------|----------------------------|-----------------------------|
| <b>Current job classification:</b> |                                             |                           |                             |                            |                             |                            |                             |
| NS-SEC                             | Semi-routine, routine worked/LT unemployed  | Ref.                      | Ref.                        | Ref.                       | Ref.                        | Ref.                       | Ref.                        |
|                                    | Lower supervisory and technical             | -0.196<br>(-1.782, 1.39)  | 0.7<br>(-0.509, 1.909)      | -1.384<br>(-3.338, 0.571)  | 1.003<br>(-0.517, 2.523)    | -0.003<br>(-0.028, 0.021)  | -0.01<br>(-0.053, 0.034)    |
|                                    | Small employers and own account             | 0.101<br>(-1.195, 1.397)  | -0.246<br>(-1.234, 0.742)   | -0.94<br>(-2.538, 0.657)   | -0.709<br>(-1.951, 0.533)   | -0.012<br>(-0.032, 0.007)  | -0.048<br>(-0.083, -0.012)* |
|                                    | Intermediate                                | -0.695<br>(-1.949, 0.558) | -0.965<br>(-1.921, -0.009)* | -1.336<br>(-2.881, 0.21)   | -1.015<br>(-2.217, 0.187)   | -0.021<br>(-0.04, -0.002)* | -0.03<br>(-0.064, 0.005)    |
|                                    | Management and professional                 | 0.248<br>(-0.731, 1.226)  | 0.018<br>(-0.729, 0.764)    | -1.454<br>(-2.66, -0.247)* | -1.471<br>(-2.409, -0.532)* | -0.035<br>(-0.05, -0.02)*  | -0.072<br>(-0.099, -0.045)* |
| Job sector                         | Other type of organization                  | Ref.                      | Ref.                        | Ref.                       | Ref.                        | Ref.                       | Ref.                        |
|                                    | Private firm or business, a limited company | 0.092<br>(-0.753, 0.937)  | 0.096<br>(-0.545, 0.737)    | -0.433<br>(-1.467, 0.601)  | 1.243<br>(0.454, 2.032)*    | 0.012<br>(-0.001, 0.025)   | 0.001<br>(-0.022, 0.025)    |
| <b>Job stability:</b>              |                                             |                           |                             |                            |                             |                            |                             |
| Status contract                    | A permanent job                             | Ref.                      | Ref.                        | Ref.                       | Ref.                        | Ref.                       | Ref.                        |
|                                    | Not permanent job                           | 0.119<br>(-1.713, 1.951)  | 0.267<br>(-1.13, 1.664)     | -0.825<br>(-3.078, 1.428)  | 0.303<br>(-1.468, 2.073)    | 0.002<br>(-0.026, 0.031)   | 0.004<br>(-0.047, 0.055)    |
| Status job                         | Paid employment(ft/pt)                      | Ref.                      | Ref.                        | Ref.                       | Ref.                        | Ref.                       | Ref.                        |
|                                    | Self employed                               | 0.005<br>(-1.02, 1.03)    | -0.254<br>(-1.033, 0.525)   | -0.275<br>(-1.532, 0.981)  | -0.442<br>(-1.44, 0.557)    | 0.003<br>(-0.014, 0.019)   | -0.015<br>(-0.044, 0.014)   |
|                                    | Unemployed                                  | 0.215<br>(-1.528, 1.958)  | 1.477<br>(0.152, 2.802)*    | 3.364<br>(1.227, 5.5)*     | 4.37<br>(2.672, 6.067)*     | 0.077<br>(0.05, 0.105)*    | 0.087<br>(0.038, 0.136)*    |
| Job security                       | Unlikely to lose their job                  | Ref.                      | Ref.                        | Ref.                       | Ref.                        | Ref.                       | Ref.                        |
|                                    | Likely to lose their job                    | 1.158<br>(-0.308, 2.623)  | 1.223<br>(0.111, 2.334)*    | 2.806<br>(1.02, 4.591)*    | 1.005<br>(-0.375, 2.384)    | 0.011<br>(-0.012, 0.033)   | 0.034<br>(-0.007, 0.075)    |
| Pay type                           | Salaried                                    | Ref.                      | Ref.                        | Ref.                       | Ref.                        | Ref.                       | Ref.                        |
|                                    | Paid by the hour                            | 0.611<br>(-0.281, 1.504)  | 0.448<br>(-0.225, 1.121)    | 1.331<br>(0.244, 2.418)*   | 1.267<br>(0.432, 2.101)*    | 0.022<br>(0.008, 0.036)*   | 0.04<br>(0.015, 0.065)*     |
| Has second job                     | No                                          | Ref.                      | Ref.                        | Ref.                       | Ref.                        | Ref.                       | Ref.                        |
|                                    | Yes                                         | -0.656<br>(-1.965, 0.653) | -0.044<br>(-1.044, 0.956)   | 0.034<br>(-1.586, 1.655)   | 0.348<br>(-0.955, 1.65)     | 0.013<br>(-0.009, 0.034)   | 0.005<br>(-0.032, 0.042)    |
| <b>Job schedule:</b>               |                                             |                           |                             |                            |                             |                            |                             |
| Working time                       | During the day                              | Ref.                      | Ref.                        | Ref.                       | Ref.                        | Ref.                       | Ref.                        |
|                                    | Night                                       | -0.149<br>(-2.192, 1.894) | 0.667<br>(-0.891, 2.224)    | 2.271<br>(-0.241, 4.782)   | 2.605<br>(0.642, 4.568)*    | 0.054<br>(0.022, 0.086)*   | 0.076<br>(0.019, 0.133)*    |
|                                    | Rotating shifts                             | 0.09<br>(-0.801, 0.981)   | 0.214<br>(-0.465, 0.894)    | 0.163<br>(-0.932, 1.258)   | -0.154<br>(-1.011, 0.702)   | 0.003<br>(-0.011, 0.017)   | -0.005<br>(-0.029, 0.02)    |
| Working weekends                   | No weekend working                          | Ref.                      | Ref.                        | Ref.                       | Ref.                        | Ref.                       | Ref.                        |
|                                    | Yes - some weekends                         | 0.199<br>(-0.64, 1.039)   | 0.118<br>(-0.523, 0.758)    | -0.032<br>(-1.065, 1.002)  | 0.087<br>(-0.724, 0.898)    | 0.003<br>(-0.01, 0.016)    | -0.002<br>(-0.025, 0.022)   |
|                                    | Yes - most/ Every weekend                   | 0.307<br>(-0.714, 1.328)  | 0.217<br>(-0.562, 0.997)    | 0.691<br>(-0.566, 1.949)   | 0.515<br>(-0.472, 1.502)    | 0<br>(-0.016, 0.016)       | 0.002<br>(-0.027, 0.031)    |
| Working hours                      | Less than 40 hours                          | Ref.                      | Ref.                        | Ref.                       | Ref.                        | Ref.                       | Ref.                        |
|                                    | 40 hours                                    | 1.037<br>(-0.226, 2.3)    | 0.757<br>(-0.202, 1.716)    | 1.072<br>(-0.474, 2.618)   | 2.218<br>(1.044, 3.393)*    | 0.02<br>(0, 0.039)*        | -0.017<br>(-0.053, 0.018)   |
|                                    | More than 40 hours                          | 0.102<br>(-1.436, 1.64)   | -0.045<br>(-1.213, 1.122)   | -1.507<br>(-3.389, 0.376)  | 1.019<br>(-0.411, 2.45)     | -0.005<br>(-0.029, 0.019)  | -0.035<br>(-0.078, 0.008)   |

| <b>Autonomy and influence at work:</b> |                                    |                           |                           |                           |                           |                             |                             |
|----------------------------------------|------------------------------------|---------------------------|---------------------------|---------------------------|---------------------------|-----------------------------|-----------------------------|
| Managerial duties                      | Not manager/supervisor             | Ref.                      | Ref.                      | Ref.                      | Ref.                      | Ref.                        | Ref.                        |
|                                        | Foreman/supervisor                 | 0.168<br>(-1.054, 1.39)   | 0.332<br>(-0.594, 1.258)  | 0.245<br>(-1.253, 1.742)  | 0.424<br>(-0.728, 1.576)  | 0.008<br>(-0.011, 0.027)    | -0.009<br>(-0.043, 0.025)   |
|                                        | Manager                            | 0.395<br>(-0.618, 1.408)  | 0.551<br>(-0.216, 1.319)  | -0.581<br>(-1.823, 0.66)  | -0.076<br>(-1.031, 0.879) | -0.011<br>(-0.026, 0.005)   | -0.036<br>(-0.064, -0.008)* |
| Job autonomy                           | (15, 20) High                      | Ref.                      | Ref.                      | Ref.                      | Ref.                      | Ref.                        | Ref.                        |
|                                        | (10, 15) Medium                    | -0.125<br>(-1.568, 1.317) | -0.748<br>(-1.841, 0.345) | -1.745<br>(-3.516, 0.025) | -0.372<br>(-1.763, 1.018) | -0.011<br>(-0.033, 0.012)   | -0.062<br>(-0.103, -0.022)* |
|                                        | (0, 10) Low                        | 0.186<br>(-1.131, 1.502)  | 0.242<br>(-0.755, 1.24)   | -0.75<br>(-2.367, 0.866)  | 0.431<br>(-0.839, 1.7)    | 0.001<br>(-0.019, 0.022)    | -0.038<br>(-0.075, -0.001)* |
| <b>Occupational physical activity</b>  |                                    |                           |                           |                           |                           |                             |                             |
| OPA                                    | Not very active/<br>Not at all     | Ref.                      | Ref.                      | Ref.                      | Ref.                      | Ref.                        | Ref.                        |
|                                        | Fairly Active                      | -0.159<br>(-0.988, 0.669) | -0.059<br>(-0.691, 0.574) | 0.363<br>(-0.658, 1.383)  | 0.466<br>(-0.33, 1.261)   | 0.014<br>(0.002, 0.027)*    | 0.027<br>(0.004, 0.05)*     |
|                                        | Very Active                        | 0.281<br>(-0.782, 1.344)  | 0.27<br>(-0.541, 1.081)   | 0.646<br>(-0.663, 1.956)  | 1.53<br>(0.509, 2.551)*   | 0.028<br>(0.012, 0.045)*    | 0.05<br>(0.021, 0.08)*      |
| <b>Feelings regarding the job</b>      |                                    |                           |                           |                           |                           |                             |                             |
| Job satisfaction                       | Neither Satisfied/<br>Dissatisfied | Ref.                      | Ref.                      | Ref.                      | Ref.                      | Ref.                        | Ref.                        |
|                                        | Dissatisfied                       | -0.186<br>(-2.043, 1.671) | -0.058<br>(-1.475, 1.359) | -1.256<br>(-3.541, 1.03)  | 1.55<br>(-0.242, 3.341)   | 0.009<br>(-0.02, 0.038)     | -0.009<br>(-0.061, 0.043)   |
|                                        | Satisfied                          | 0.417<br>(-1.141, 1.975)  | -0.41<br>(-1.599, 0.779)  | -0.131<br>(-2.049, 1.787) | 1.363<br>(-0.14, 2.866)   | 0.005<br>(-0.02, 0.029)     | -0.01<br>(-0.054, 0.033)    |
| Job feelings                           | [6, 8) Positive                    | Ref.                      | Ref.                      | Ref.                      | Ref.                      | Ref.                        | Ref.                        |
|                                        | (8, 11) Average                    | -0.059<br>(-0.989, 0.87)  | -0.207<br>(-0.916, 0.503) | -0.465<br>(-1.611, 0.68)  | -0.636<br>(-1.534, 0.262) | -0.017<br>(-0.031, -0.002)* | -0.026<br>(-0.052, 0)       |
|                                        | (11, 30) Negative                  | -0.423<br>(-1.311, 0.464) | -0.358<br>(-1.036, 0.319) | -0.2<br>(-1.295, 0.894)   | -0.428<br>(-1.285, 0.43)  | -0.009<br>(-0.023, 0.004)   | -0.005<br>(-0.029, 0.02)    |

Fully adjusted models for: BMI, alcohol consumption, educational level and smoking. \**p*-value < 0.05.

**Supplementary Table 2. Men linear regression coefficient estimates with 95% confidence intervals for the epigenetic age and pace of aging.**

|                                    | Levels                                         | HorvathAA                 | HannumAA                   | PhenoAA                    | GrimAgeAA                 | DunedinPoAm               | DunedinPACE                |
|------------------------------------|------------------------------------------------|---------------------------|----------------------------|----------------------------|---------------------------|---------------------------|----------------------------|
| <b>Current job classification:</b> |                                                |                           |                            |                            |                           |                           |                            |
| NS-SEC                             | Semi-routine, routine<br>worked/LT unemployed  | Ref.                      | Ref.                       | Ref.                       | Ref.                      | Ref.                      | Ref.                       |
|                                    | Lower supervisory and<br>technical             | 1.824<br>(-0.23, 3.878)   | 0.949<br>(-0.718, 2.617)   | 1.169<br>(-1.351, 3.69)    | 0.138<br>(-1.417, 1.693)  | -0.001<br>(-0.029, 0.028) | 0.003<br>(-0.06, 0.066)    |
|                                    | Small employers and<br>own account             | 0.883<br>(-0.958, 2.724)  | 0.032<br>(-1.463, 1.527)   | 0.787<br>(-1.472, 3.046)   | -0.459<br>(-1.852, 0.935) | 0.002<br>(-0.024, 0.028)  | -0.031<br>(-0.087, 0.026)  |
|                                    | Intermediate                                   | 0.36<br>(-1.909, 2.63)    | 0.006<br>(-1.837, 1.848)   | 0.296<br>(-2.489, 3.081)   | -0.929<br>(-2.647, 0.789) | -0.002<br>(-0.033, 0.03)  | -0.015<br>(-0.084, 0.055)  |
|                                    | Management and<br>professional                 | 0.927<br>(-0.763, 2.618)  | 0.613<br>(-0.759, 1.986)   | 0.164<br>(-1.911, 2.239)   | -0.576<br>(-1.856, 0.705) | -0.002<br>(-0.025, 0.022) | -0.057<br>(-0.109, -0.005) |
| Job sector                         | Other type of organization                     | Ref.                      | Ref.                       | Ref.                       | Ref.                      | Ref.                      | Ref.                       |
|                                    | Private firm or business,<br>a limited company | -1.098<br>(-2.452, 0.255) | -1.824<br>(-2.908, -0.741) | -3.251<br>(-4.866, -1.635) | -0.568<br>(-1.585, 0.449) | -0.017<br>(-0.036, 0.002) | -0.053<br>(-0.096, -0.01)  |
| <b>Job stability:</b>              |                                                |                           |                            |                            |                           |                           |                            |
| Status contract                    | A permanent job                                | Ref.                      | Ref.                       | Ref.                       | Ref.                      | Ref.                      | Ref.                       |
|                                    | Not permanent job                              | -0.112<br>(-2.761, 2.538) | -0.023<br>(-2.169, 2.123)  | -0.556<br>(-3.792, 2.68)   | -0.48<br>(-2.479, 1.52)   | 0.014<br>(-0.023, 0.05)   | 0.002<br>(-0.08, 0.083)    |

|                |                            |                           |                           |                          |                          |                           |                           |
|----------------|----------------------------|---------------------------|---------------------------|--------------------------|--------------------------|---------------------------|---------------------------|
| Status job     | Paid employment(ft/pt)     | Ref.                      | Ref.                      | Ref.                     | Ref.                     | Ref.                      | Ref.                      |
|                | Self employed              | -0.086<br>(-1.461, 1.289) | -0.456<br>(-1.551, 0.639) | 0.494<br>(-1.181, 2.17)  | -0.48<br>(-1.499, 0.539) | 0.005<br>(-0.014, 0.024)  | 0<br>(-0.043, 0.042)      |
|                | Unemployed                 | 0.418<br>(-2.587, 3.424)  | 1.155<br>(-1.239, 3.549)  | 4.694<br>(1.032, 8.356)* | 2.112<br>(-0.116, 4.339) | 0.067<br>(0.026, 0.108)*  | 0.122<br>(0.029, 0.215)*  |
| Job security   | Unlikely to lose their job | Ref.                      | Ref.                      | Ref.                     | Ref.                     | Ref.                      | Ref.                      |
|                | Likely to lose their job   | -0.5<br>(-2.696, 1.697)   | 1.118<br>(-0.675, 2.91)   | 0.896<br>(-1.817, 3.61)  | 1.063<br>(-0.558, 2.685) | 0.028<br>(-0.002, 0.058)  | 0.045<br>(-0.026, 0.115)  |
| Pay type       | Salaried                   | Ref.                      | Ref.                      | Ref.                     | Ref.                     | Ref.                      | Ref.                      |
|                | Paid by the hour           | 1.086<br>(-0.358, 2.53)   | 0.022<br>(-1.161, 1.206)  | 0.583<br>(-1.208, 2.375) | 1.571<br>(0.507, 2.634)* | 0<br>(-0.02, 0.02)        | 0.014<br>(-0.033, 0.061)  |
| Has second job | No                         | Ref.                      | Ref.                      | Ref.                     | Ref.                     | Ref.                      | Ref.                      |
|                | Yes                        | -0.498<br>(-2.446, 1.45)  | -0.123<br>(-1.68, 1.435)  | 0.273<br>(-2.132, 2.678) | -0.874<br>(-2.328, 0.58) | -0.006<br>(-0.034, 0.021) | -0.004<br>(-0.066, 0.057) |

#### Job Schedule:

|                  |                          |                           |                             |                             |                           |                           |                            |
|------------------|--------------------------|---------------------------|-----------------------------|-----------------------------|---------------------------|---------------------------|----------------------------|
| Working time     | During the day           | Ref.                      | Ref.                        | Ref.                        | Ref.                      | Ref.                      | Ref.                       |
|                  | Night                    | -1.086<br>(-3.886, 1.713) | -0.869<br>(-3.136, 1.399)   | -0.524<br>(-3.948, 2.899)   | 0.881<br>(-1.233, 2.994)  | 0.016<br>(-0.023, 0.055)  | 0.047<br>(-0.039, 0.133)   |
|                  | Rotating shifts          | 0.056<br>(-1.264, 1.376)  | -0.173<br>(-1.242, 0.896)   | -0.215<br>(-1.829, 1.399)   | 0.073<br>(-0.923, 1.07)   | 0.004<br>(-0.014, 0.022)  | 0.018<br>(-0.023, 0.059)   |
| Working weekends | No weekend working       | Ref.                      | Ref.                        | Ref.                        | Ref.                      | Ref.                      | Ref.                       |
|                  | Yes – some weekends      | -0.187<br>(-1.408, 1.034) | -0.463<br>(-1.453, 0.526)   | -0.959<br>(-2.45, 0.532)    | -0.953<br>(-1.867, -0.04) | -0.01<br>(-0.026, 0.007)  | -0.022<br>(-0.06, 0.015)   |
|                  | Yes – most/every weekend | -0.864<br>(-2.317, 0.588) | -0.538<br>(-1.716, 0.639)   | -0.32<br>(-2.094, 1.454)    | 0.078<br>(-1.01, 1.165)   | -0.001<br>(-0.021, 0.019) | -0.023<br>(-0.068, 0.022)  |
| Working hours    | Less than 40 hours       | Ref.                      | Ref.                        | Ref.                        | Ref.                      | Ref.                      | Ref.                       |
|                  | 40 hours                 | -0.42<br>(-2.011, 1.171)  | -0.943<br>(-2.228, 0.342)   | -0.19<br>(-2.138, 1.759)    | 0.044<br>(-1.144, 1.233)  | -0.006<br>(-0.028, 0.016) | -0.062<br>(-0.112, -0.011) |
|                  | More than 40 hours       | -0.915<br>(-2.706, 0.877) | -1.621<br>(-3.068, -0.174)* | -2.238<br>(-4.432, -0.045)* | -0.939<br>(-2.278, 0.399) | -0.019<br>(-0.044, 0.006) | -0.054<br>(-0.111, 0.002)  |

#### Autonomy and influence at work:

|                   |                        |                           |                           |                           |                           |                           |                            |
|-------------------|------------------------|---------------------------|---------------------------|---------------------------|---------------------------|---------------------------|----------------------------|
| Managerial duties | Not manager/supervisor | Ref.                      | Ref.                      | Ref.                      | Ref.                      | Ref.                      | Ref.                       |
|                   | Foreman/supervisor     | 1.933<br>(0.163, 3.702)   | 0.972<br>(-0.496, 2.44)   | 1.505<br>(-0.703, 3.713)  | 0.471<br>(-0.875, 1.818)  | 0.009<br>(-0.016, 0.034)  | 0.015<br>(-0.043, 0.072)   |
|                   | Manager                | -0.644<br>(-2.082, 0.795) | -0.014<br>(-1.207, 1.179) | -0.555<br>(-2.351, 1.24)  | -0.301<br>(-1.395, 0.794) | -0.007<br>(-0.028, 0.013) | -0.033<br>(-0.079, 0.014)  |
| Job autonomy      | (15, 20) High          | Ref.                      | Ref.                      | Ref.                      | Ref.                      | Ref.                      | Ref.                       |
|                   | (10, 15) Medium        | 0.043<br>(-2.244, 2.329)  | -0.878<br>(-2.728, 0.972) | -1.639<br>(-4.427, 1.148) | -1.295<br>(-3.015, 0.425) | -0.022<br>(-0.054, 0.009) | -0.088<br>(-0.157, -0.018) |
|                   | (0, 10) Low            | -0.296<br>(-2.291, 1.7)   | -0.458<br>(-2.073, 1.156) | -1.163<br>(-3.596, 1.27)  | -0.854<br>(-2.355, 0.647) | 0.003<br>(-0.024, 0.031)  | -0.04<br>(-0.101, 0.021)   |

#### Occupational physical activity:

|     |                            |                           |                           |                           |                          |                          |                          |
|-----|----------------------------|---------------------------|---------------------------|---------------------------|--------------------------|--------------------------|--------------------------|
| OPA | Not very active/Not at all | Ref.                      | Ref.                      | Ref.                      | Ref.                     | Ref.                     | Ref.                     |
|     | Fairly Active              | -0.239<br>(-1.484, 1.006) | -0.44<br>(-1.448, 0.567)  | -0.408<br>(-1.926, 1.11)  | 0.009<br>(-0.931, 0.949) | 0.007<br>(-0.01, 0.024)  | 0.006<br>(-0.033, 0.044) |
|     | Very Active                | -0.448<br>(-1.954, 1.058) | -0.225<br>(-1.444, 0.993) | -1.067<br>(-2.903, 0.769) | 0.306<br>(-0.831, 1.443) | 0.002<br>(-0.019, 0.023) | 0.007<br>(-0.04, 0.054)  |

#### Feelings regarding the job:

|                  |                                    |                          |                          |                          |                           |                         |                          |
|------------------|------------------------------------|--------------------------|--------------------------|--------------------------|---------------------------|-------------------------|--------------------------|
| Job satisfaction | Neither Satisfied/<br>Dissatisfied | Ref.                     | Ref.                     | Ref.                     | Ref.                      | Ref.                    | Ref.                     |
|                  | Dissatisfied                       | -2.062<br>(-4.86, 0.735) | 0.123<br>(-2.151, 2.396) | 0.653<br>(-2.777, 4.083) | -0.477<br>(-2.598, 1.643) | 0.011<br>(-0.028, 0.05) | -0.01<br>(-0.096, 0.077) |

|              |                   |                           |                           |                           |                           |                             |                            |
|--------------|-------------------|---------------------------|---------------------------|---------------------------|---------------------------|-----------------------------|----------------------------|
|              | Satisfied         | -1.604<br>(-4.152, 0.944) | -0.295<br>(-2.365, 1.776) | 0.117<br>(-3.007, 3.241)  | -0.317<br>(-2.248, 1.615) | 0.006<br>(-0.03, 0.041)     | -0.007<br>(-0.086, 0.072)  |
| Job feelings | [6, 8) Positive   | Ref.                      | Ref.                      | Ref.                      | Ref.                      | Ref.                        | Ref.                       |
|              | (8, 11) Average   | -0.419<br>(-1.708, 0.871) | -0.776<br>(-1.817, 0.266) | -1.5<br>(-3.065, 0.066)   | -0.715<br>(-1.688, 0.258) | -0.026<br>(-0.044, -0.009)* | -0.045<br>(-0.084, -0.005) |
|              | (11, 30) Negative | -0.851<br>(-2.185, 0.483) | -0.757<br>(-1.835, 0.321) | -1.409<br>(-3.029, 0.211) | -0.199<br>(-1.205, 0.808) | -0.006<br>(-0.024, 0.012)   | -0.009<br>(-0.05, 0.032)   |

Fully adjusted models for: BMI, alcohol consumption, educational level and smoking. \**p*-value < 0.05.

**Supplementary Table 3. Women linear regression coefficient estimates with 95% confidence interval for the epigenetic age and pace of aging.**

|                                    | Levels                                      | HorvathAA                  | HannumAA                 | PhenoAA                   | GrimaAgeAA                | DunedinPoAm                | DunedinPACE               |
|------------------------------------|---------------------------------------------|----------------------------|--------------------------|---------------------------|---------------------------|----------------------------|---------------------------|
| <b>Current job classification:</b> |                                             |                            |                          |                           |                           |                            |                           |
| NS-SEC                             | Semi-routine, routine worked/LT unemployed  | Ref.                       | Ref.                     | Ref.                      | Ref.                      | Ref.                       | Ref.                      |
|                                    | Lower supervisory and technical             | -2.781<br>(-5.505, -0.057) | -0.095<br>(-2.12, 1.93)  | -3.119<br>(-6.506, 0.267) | 0.738<br>(-1.23, 2.705)   | -0.003<br>(-0.04, 0.034)   | -0.01<br>(-0.08, 0.06)    |
|                                    | Small employers and own account             | 0.965<br>(-1.005, 2.936)   | -0.324<br>(-1.789, 1.14) | -0.291<br>(-2.74, 2.159)  | -0.512<br>(-1.935, 0.911) | 0.002<br>(-0.024, 0.029)   | -0.043<br>(-0.094, 0.007) |
|                                    | Intermediate                                | -0.284<br>(-1.83, 1.262)   | -0.92<br>(-2.069, 0.229) | -1.27<br>(-3.192, 0.653)  | 0.618<br>(-0.499, 1.734)  | -0.012<br>(-0.033, 0.009)  | -0.014<br>(-0.054, 0.025) |
|                                    | Management and professional                 | 0.448<br>(-1.015, 1.911)   | 0.162<br>(-0.926, 1.25)  | -0.564<br>(-2.383, 1.256) | -0.108<br>(-1.164, 0.949) | -0.023<br>(-0.042, -0.003) | -0.036<br>(-0.074, 0.001) |
| Job sector                         | Other type of organization                  | Ref.                       | Ref.                     | Ref.                      | Ref.                      | Ref.                       | Ref.                      |
|                                    | Private firm or business, a limited company | 0.523<br>(-0.664, 1.709)   | 0.328<br>(-0.531, 1.188) | 0.274<br>(-1.153, 1.701)  | 0.024<br>(-0.809, 0.857)  | 0.005<br>(-0.011, 0.02)    | 0.008<br>(-0.022, 0.037)  |
| <b>Job stability:</b>              |                                             |                            |                          |                           |                           |                            |                           |
| Status contract                    | A permanent job                             | Ref.                       | Ref.                     | Ref.                      | Ref.                      | Ref.                       | Ref.                      |
|                                    | Not permanent job                           | 0.476<br>(-1.922, 2.874)   | 1.155<br>(-0.603, 2.913) | 0.009<br>(-2.939, 2.956)  | 1.149<br>(-0.561, 2.86)   | 0<br>(-0.032, 0.032)       | 0.023<br>(-0.038, 0.084)  |
| Status job                         | Paid employment (ft/pt)                     | Ref.                       | Ref.                     | Ref.                      | Ref.                      | Ref.                       | Ref.                      |
|                                    | Self employed                               | 0.683<br>(-0.889, 2.255)   | -0.414<br>(-1.578, 0.75) | -0.081<br>(-2.03, 1.868)  | -0.781<br>(-1.891, 0.328) | 0.005<br>(-0.016, 0.026)   | -0.019<br>(-0.059, 0.02)  |
|                                    | Unemployed                                  | 0.274<br>(-2.165, 2.712)   | 1.797<br>(-0.009, 3.603) | 2.478<br>(-0.546, 5.502)  | 1.097<br>(-0.625, 2.819)  | 0.017<br>(-0.016, 0.05)    | 0.001<br>(-0.061, 0.062)  |
| Job security                       | Unlikely to lose their job                  | Ref.                       | Ref.                     | Ref.                      | Ref.                      | Ref.                       | Ref.                      |
|                                    | Likely to lose their job                    | 1.204<br>(-0.875, 3.282)   | 0.373<br>(-1.152, 1.898) | 2.677<br>(0.183, 5.171)   | 0.513<br>(-0.96, 1.986)   | -0.003<br>(-0.031, 0.024)  | 0.02<br>(-0.032, 0.072)   |
| Pay type                           | Salaried                                    | Ref.                       | Ref.                     | Ref.                      | Ref.                      | Ref.                       | Ref.                      |
|                                    | paid by the hour                            | 0.422<br>(-0.796, 1.64)    | 0.791<br>(-0.086, 1.668) | 1.353<br>(-0.102, 2.807)  | 0.016<br>(-0.839, 0.87)   | 0.009<br>(-0.007, 0.025)   | 0.019<br>(-0.011, 0.049)  |
| Has second job                     | No                                          | Ref.                       | Ref.                     | Ref.                      | Ref.                      | Ref.                       | Ref.                      |
|                                    | Yes                                         | -1.329<br>(-3.108, 0.45)   | 0.294<br>(-1.037, 1.624) | 0.656<br>(-1.563, 2.876)  | 1.443<br>(0.186, 2.699)*  | 0.026<br>(0.002, 0.05)*    | 0.023<br>(-0.022, 0.067)  |
| <b>Job schedule:</b>               |                                             |                            |                          |                           |                           |                            |                           |
| Working time                       | During the day                              | Ref.                       | Ref.                     | Ref.                      | Ref.                      | Ref.                       | Ref.                      |
|                                    | Night                                       | 0.92<br>(-1.829, 3.669)    | 2.223<br>(0.221, 4.224)* | 4.445<br>(1.104, 7.786)*  | 3.302<br>(1.374, 5.229)*  | 0.067<br>(0.032, 0.103)*   | 0.068<br>(-0.001, 0.138)  |
|                                    | Rotating shifts                             | 0.307<br>(-0.913, 1.527)   | 0.651<br>(-0.237, 1.539) | 0.653<br>(-0.829, 2.136)  | -0.265<br>(-1.121, 0.59)  | 0.006<br>(-0.01, 0.022)    | -0.012<br>(-0.043, 0.019) |
| Working weekends                   | No weekend working                          | Ref.                       | Ref.                     | Ref.                      | Ref.                      | Ref.                       | Ref.                      |

|                                        |                                |                           |                           |                             |                           |                           |                            |
|----------------------------------------|--------------------------------|---------------------------|---------------------------|-----------------------------|---------------------------|---------------------------|----------------------------|
|                                        | Yes – some weekends            | 0.861<br>(-0.29, 2.013)   | 0.48<br>(-0.37, 1.33)     | 1.021<br>(-0.398, 2.441)    | -0.369<br>(-1.197, 0.459) | 0.003<br>(-0.013, 0.018)  | 0.002<br>(-0.027, 0.032)   |
|                                        | Yes – most/every weekend       | 1.223<br>(-0.235, 2.681)  | 0.16<br>(-0.916, 1.237)   | 0.681<br>(-1.115, 2.478)    | 0.025<br>(-1.023, 1.073)  | -0.004<br>(-0.024, 0.016) | 0.005<br>(-0.032, 0.043)   |
| Working hours                          | Less than 40 hours             | Ref.                      | Ref.                      | Ref.                        | Ref.                      | Ref.                      | Ref.                       |
|                                        | 40 hours                       | 0.561<br>(-1.746, 2.868)  | 0.815<br>(-0.854, 2.483)  | 1.559<br>(-1.211, 4.33)     | 0.914<br>(-0.7, 2.528)    | 0.031<br>(0.001, 0.061)*  | 0.026<br>(-0.031, 0.084)   |
|                                        | More than 40 hours             | 1.838<br>(-1.988, 5.663)  | 1.174<br>(-1.592, 3.94)   | 0.771<br>(-3.822, 5.365)    | 1.247<br>(-1.43, 3.924)   | 0.014<br>(-0.036, 0.063)  | -0.021<br>(-0.116, 0.074)  |
| <b>Autonomy and influence at work:</b> |                                |                           |                           |                             |                           |                           |                            |
| Managerial duties                      | Not manager/supervisor         | Ref.                      | Ref.                      | Ref.                        | Ref.                      | Ref.                      | Ref.                       |
|                                        | Foreman/supervisor             | -0.918<br>(-2.579, 0.743) | 0.123<br>(-1.082, 1.327)  | 0.091<br>(-1.912, 2.094)    | 0.138<br>(-1.03, 1.305)   | 0.012<br>(-0.01, 0.034)   | -0.006<br>(-0.048, 0.035)  |
|                                        | Manager                        | 0.578<br>(-1.008, 2.164)  | 0.631<br>(-0.519, 1.781)  | -0.353<br>(-2.265, 1.56)    | -0.443<br>(1.557, 0.672)  | -0.006<br>(-0.026, 0.015) | -0.008<br>(-0.047, 0.032)  |
| <b>Job autonomy:</b>                   |                                |                           |                           |                             |                           |                           |                            |
|                                        | (15, 20) High                  | Ref.                      | Ref.                      | Ref.                        | Ref.                      | Ref.                      | Ref.                       |
|                                        | (10, 15) Medium                | -0.689<br>(-2.513, 1.134) | -0.473<br>(-1.811, 0.865) | -2.321<br>(-4.546, -0.096)  | -0.858<br>(-2.157, 0.44)  | -0.019<br>(-0.044, 0.005) | -0.071<br>(-0.117, -0.025) |
|                                        | (0, 10) Low                    | -0.102<br>(-1.808, 1.603) | 0.178<br>(-1.074, 1.429)  | -0.974<br>(-3.054, 1.106)   | -0.065<br>(-1.28, 1.149)  | -0.011<br>(-0.033, 0.012) | -0.045<br>(-0.088, -0.003) |
| <b>Occupational physical activity:</b> |                                |                           |                           |                             |                           |                           |                            |
| OPA                                    | Not very active/<br>Not at all | Ref.                      | Ref.                      | Ref.                        | Ref.                      | Ref.                      | Ref.                       |
|                                        | Fairly Active                  | -0.18<br>(-1.321, 0.961)  | 0.353<br>(-0.487, 1.194)  | 0.233<br>(-1.163, 1.629)    | 0.602<br>(-0.214, 1.418)  | 0.014<br>(-0.001, 0.029)  | 0.03<br>(0.001, 0.058)*    |
|                                        | Very Active                    | 0.954<br>(-0.59, 2.498)   | 0.531<br>(-0.606, 1.669)  | 2.046<br>(0.157, 3.936)*    | 0.39<br>(-0.715, 1.495)   | 0.024<br>(0.003, 0.044)*  | 0.056<br>(0.017, 0.095)*   |
| <b>Feelings regarding the job:</b>     |                                |                           |                           |                             |                           |                           |                            |
| Job satisfaction                       | Neither Satisfied/Dissatisfied | Ref.                      | Ref.                      | Ref.                        | Ref.                      | Ref.                      | Ref.                       |
|                                        | Dissatisfied                   | -0.468<br>(-3.071, 2.135) | -0.378<br>(-2.299, 1.542) | -3.865<br>(-7.024, -0.706)* | 1.299<br>(-0.564, 3.162)  | -0.01<br>(-0.045, 0.025)  | -0.028<br>(-0.094, 0.038)  |
|                                        | Satisfied                      | 0.695<br>(-1.427, 2.817)  | -0.35<br>(-1.916, 1.215)  | -0.758<br>(-3.333, 1.818)   | 0.857<br>(-0.661, 2.376)  | -0.018<br>(-0.046, 0.01)  | -0.047<br>(-0.101, 0.007)  |
| Job feelings                           | (6, 8) Positive                | Ref.                      | Ref.                      | Ref.                        | Ref.                      | Ref.                      | Ref.                       |
|                                        | (8, 11) Average                | 0.242<br>(-1.082, 1.565)  | 0.207<br>(-0.766, 1.181)  | 0.221<br>(-1.406, 1.849)    | 0.002<br>(-0.946, 0.949)  | -0.004<br>(-0.022, 0.014) | -0.008<br>(-0.042, 0.026)  |
|                                        | (11, 30) Negative              | -0.163<br>(-1.366, 1.04)  | 0.067<br>(-0.818, 0.952)  | -0.052<br>(-1.532, 1.428)   | -0.141<br>(1.002, 0.721)  | -0.008<br>(-0.024, 0.008) | 0.008<br>(-0.023, 0.038)   |

Fully adjusted models for: BMI, alcohol consumption, educational level and smoking. \*  $p$ -value < 0.05.
